# Supplementary material
Source: Research Square preprint supplement (doi:10.21203/rs.3.rs-9227125/v1)
Supplement: Supplementary file 1 [file 8c63f637ff9d4c2f4f902213.docx]

|  |  |  |  |  |  |  |  |
| --- | --- | --- | --- | --- | --- | --- | --- |
| **Table 2. MBF and hemodynamic findings during PET/CT exam** | | | | | |
|  | **Group 1** | **Group 2** | **p Value** | **Group 3** | **p Value** |
| Flow Parameters |  |  |  |  |  |
| MBF-Rest | 0.87 ± 0.18 | 0.90 ± 0.21 | 0.220 | 1.25 ± 0.13 | 0.001 |
| NMBF-Rest | 0.90 ± 0.20 | 0.92 ± 0.24 | 0.700 | 1.07 ± 0.16 | 0.001 |
| MBF-Stress | 2.39 ± 0.46 | 1.53 ± 0.30 | 0.001 | 2.32 ± 0.28 | 0.192 |
| MFR | 2.81 ± 0.51 | 1.73 ± 0.24 | 0.001 | 1.84 ± 0.13 | 0.001 |
| Corrected MFR | 2.73 ± 0.68 | 1.73 ± 0.41 | 0.001 | 2.21 ± 0.35 | 0.001 |
| CVR-Rest | 119 ± 25 | 117 ± 30 | 0.115 | 84 ± 10 | 0.001 |
| CVR-Stress | 37 ± 8 | 57 ± 13 | 0.001 | 41 ± 7 | 0.019 |
| MBF Gradient-Rest | -0.03 ± 0.05 | 0.02 ± 0.09 | 0.113 | -0.03 ± 0.03 | 0.578 |
| MBF Gradient-Stress | -0.28 ± 0.10 | -0.19 ± 0.08 | 0.008 | -0.27 ± 0.10 | 0.795 |
| ∆MBF Gradient | -0.25 ± 0.09 | -0.21 ± 0.09 | 0.028 | -0.24 ± 0.09 | 0.234 |
| CVR Gradient-Rest | 3.43 ± 6.97 | -1.83 ± 7.53 | 0.047 | 2.11 ± 1.64 | 0.172 |
| CVR Gradient-Stress | 3.77 ± 1.52 | 5.54 ± 1.99 | 0.001 | 3.89 ± 1.62 | 0.851 |
| ∆CVR Gradient | 0.35 ± 6.49 | 7.37 ± 6.41 | 0.005 | 1.79 ± 1.96 | 0.561 |
| Hemodynamics |  |  |  |  |  |
| Rest HR, bpm | 70 ± 11 | 70 ± 11 | 0.949 | 79 ± 9 | 0.001 |
| Stress HR, bpm | 92 ± 12 | 86 ± 13 | 0.001 | 96 ± 10 | 0.061 |
| Rest-SBP, mmHg | 139 ± 18 | 143 ± 23 | 0.128 | 151 ± 17 | 0.001 |
| Stress-SBP, mmHg | 121 ± 16 | 120 ± 22 | 0.881 | 133 ± 18 | 0.001 |
| Rest-RPP | 9793 ± 1974 | 10056 ± 2122 | 0.330 | 12014 ± 1810 | 0.001 |
| Stress-RPP | 11218 ± 2137 | 10364 ± 2806 | 0.005 | 12783 ± 2136 | 0.001 |
| ∆RPP, pharmacologic – rest | 1425 ± 1452 | 307 ± 1365 | 0.001 | 768 ± 1422 | 0.010 |

Values are mean ± standard deviation (SD). P values versus Group1 (Mann-Whitney U test for independent samples).

CVR = coronary vascular resistance; HR = heart rate; MBF = myocardial blood flow; MFR = myocardial flow reserve.

PET = positron emission tomography; RPP = rate-pressure product; SBP = systolic blood pressure.

.
