# Supplementary material
Source: Research Square preprint supplement (doi:10.21203/rs.3.rs-9227125/v1)
Supplement: Supplementary file 2 [file 902698d88eab996b54ed7f2f.docx]

|  |  |  |  |  |  |
| --- | --- | --- | --- | --- | --- |
| **Table 1. Patient characteristics among groups 1-3** | | | | | |
|  | **Group 1** | **Group 2** | **p Value** | **Group 3** | **p Value** |
| N (numbers) | 210 | 83 |  | 39 |  |
| Sex (female/male) | 142/68 | 29/54 | 0.0001 | 29/10 | 0.304 |
| BMI, kg/m2 | 36.3 ± 9.98 | 35.7 ± 9.12 | 0.317 | 37.9 ± 10.1 | 0.344 |
| Age, yrs | 58.4 ± 12.4 | 66.9 ± 12.4 | 0.001 | 60.8 ± 13.3 | 0.307 |
| CCS | 0.95 ± 1.54 | 2.74 ± 2.03 | 0.001 | 1.38 ± 1.64 | 0.139 |
| Cardiovascular risk factors |  |  |  |  |  |
| Hypertension, n | 156 (74.3) | 74 (89.2) | 0.340 | 38 (97.4) | 0.279 |
| Dyslipidemia, n | 144 (68.5) | 73 (87.9) | 0.197 | 26 (66.6) | 0.918 |
| Diabetes mellitus, n | 60 (28.6) | 48 (57.8) | 0.002 | 16 (41.0) | 0.272 |
| Smoking, n | 15 (7.2) | 9 (10.8) | 0.341 | 3 (7.6) | 0.910 |
| Family history of CAD, n | 18 (8.6) | 8 (9.6) | 0.792 | 2 (5.1) | 0.497 |
| Obesity, n | 143 (68.1) | 60 (72.2) | 0.766 | 34 (87.2) | 0.338 |
| Morbid obesity, n | 78 (37.1) | 33 (39.7) | 0.780 | 16 (41.0) | 0.759 |
| Lipid status |  |  |  |  |  |
| Total cholesterol, mg/dl | 159 ± 36 | 143 ± 44 | 0.008 | 155 ± 38 | 0.479 |
| LDL cholesterol, mg/dl | 84 ± 34 | 77 ± 39 | 0.138 | 80 ± 33 | 0.439 |
| HDL cholesterol, mg/dl | 54 ± 17 | 44 ± 16 | 0.001 | 56 ± 19 | 0.871 |
| Triglyceride, mg/dl | 125 ± 70 | 131 ± 63 | 0.603 | 132 ± 88 | 0.685 |
| Glucose, mg/dl | 116 ± 37 | 123 ± 46 | 0.161 | 125 ± 46 | 0.247 |
| hs CRP, mg/l | 9.41 ± 15.61 | 21.05 ± 32.45 | 0.006 | 13.06 ± 18.48 | 0.407 |
| HbA1c, % | 6.02 ± 1.43 | 6.65 ± 1.36 | 0.003 | 6.22 ± 1.24 | 0.436 |
|  |  |  |  |  |  |

Values are mean ± standard deviation (SD). Numbers (%). P values versus group 1 (G1) (Mann-Whitney U test for independent samples).

BMI = body mass index; CCS = coronary artery calcium score; LDL = low-density lipoprotein; HDL = high-density lipoprotein;

hsCRP = high-sensitivity C-reactive protein; HbA1c = glycosylated hemoglobin.
